# Supplementary material
Source: PubMed Central journal article supplement (PMC1698604)
Supplement: bj4000531add.pdf [file bj4000531add.pdf]

**SUPPLEMENTARY MATERIAL****Table 1S** Rationale for design of the synthetic gene library.

| Residue number                    | Mutation           | Codon <sup>a</sup> | Rationale                                                                                                 |
|-----------------------------------|--------------------|--------------------|-----------------------------------------------------------------------------------------------------------|
| His42                             | His, Asn, Gln, Lys | MAS                | Mutations beneficial to tetrameric DsRed variants [1]. Not conserved in coral CFPs.                       |
| Leu44                             | Leu, Val, Ala, Pro | SYC                | Mutations beneficial to tetrameric DsRed variants [1]. Not conserved in coral CFPs.                       |
| Gln66<br>(residue of chromophore) | Gln, Lys, Met, Leu | MWG                | Mutations beneficial to <i>Aequorea</i> GFP [2] and monomeric RFPs [3]. Lys or Gln present in coral CFPs. |
| Arg70                             | Lys, Arg           | ARG                | Mutations beneficial to monomeric RFPs [4]. Lys or Arg present in coral CFPs.                             |
| Ala71                             | Ala, Val           | GYC                | Mutations beneficial to monomeric RFPs [4]. Ala or Cys present in coral CFPs.                             |
| Leu72                             | Leu, Phe, Ile      | HTC                | Phe in 2 coral CFPs and Leu in 1 coral CFP.                                                               |
| Phe83                             | Leu, Phe, Ile      | HTC                | Mutations beneficial to monomeric RFPs [3, 4]. Phe in 2 coral CFPs and Leu in 1 coral CFP.                |
| Ile104                            | Ile, Thr           | AYC                | May disrupt A-B interface interactions                                                                    |
| Phe124                            | Leu, Phe, Ile      | HTC                | Mutations beneficial to dimeric RFPs [4]. Strict conservation in coral CFPs.                              |
| Asp125                            | Lys, Arg           | ARG                | Likely to disrupt A-B interface interactions.                                                             |
| Met127                            | Lys, Arg           | ARG                | Likely to disrupt A-B interface interactions.                                                             |
| Met150                            | Met, Leu           | MTG                | Mutations beneficial to monomeric RFPs [4]. Met in 2 coral CFPs and Leu in 1 coral CFP.                   |
| His163                            | His, Gln           | CAS                | Mutations beneficial to dimeric and monomeric RFPs [3, 4]. His in 2 coral CFPs and Ala in 1 coral CFP.    |
| Ser179                            | Ser, Thr           | WCC                | Mutations beneficial to dimeric RFPs [4]. Thr in 2 coral CFPs and Ser in 1 coral CFP.                     |

<sup>a</sup>Single letter codes for bases are as follows: A = adenosine, C = cytidine, G = guanosine, T = thymidine, H = A or C or T, M = A or C, R = A or G, S = C or G, W = A or T, and Y = C or T.

**Table 2S** Mutations in dimeric and monomeric TFP variants.

| Variant | Library construction strategies                                                                          | Mutations                                                                                            |
|---------|----------------------------------------------------------------------------------------------------------|------------------------------------------------------------------------------------------------------|
| dTFP0.1 | See Supplementary Table 1.                                                                               | Inside: H42N, L44V, L72F, F124L, M150L, S179T<br>A-B interface: D125K, M127K                         |
| dTFP0.2 | 2 generations of random mutagenesis.                                                                     | Inside: D81N<br>Outside: S226P                                                                       |
| mTFP0.3 | Site-directed mutagenesis at 162 and 164.<br>Saturation mutagenesis at 163.                              | A-C interface: S162K, S164K                                                                          |
| mTFP0.4 | Saturation mutagenesis at 66.<br>Semi-saturation mutagenesis at 175.                                     | Inside: Q66C, C175V                                                                                  |
| mTFP0.5 | 3 generations of random mutagenesis.                                                                     | Inside: S62T, C66G<br>Outside: A80P, N216S<br>A-B interface: K127E, K182R                            |
| mTFP0.6 | Saturation mutagenesis at 66+163,<br>66+197.<br>Semi-saturation mutagenesis at 66+147,<br>66+213.        | Inside: G66A, L213V<br>Outside: S2N<br>Replace 223-228 with TG                                       |
| mTFP0.7 | 2 generations of random mutagenesis.                                                                     | Inside: V44I, Y173H<br>Outside: V186A<br>A-B interface: R123H<br>Mutate: N2S                         |
| mTFP0.8 | Semi-saturation mutagenesis at 62, 63,<br>64, 65, and 66 with screening for<br>photostability.           | Inside: N63T                                                                                         |
| mTFP0.9 | Semi-saturation mutagenesis at 142, 144,<br>145, 149, 150, and 161 with screening for<br>photostability. | Inside: L150M (reversion to<br>wt), I161V<br>Outside: K142G<br>A-C interface: E144D, P145A,<br>I149R |
| mTFP1   | 2 generations of random mutagenesis with<br>screening for photostability.                                | Outside: L141T, V158K,<br>Y221N, G224D                                                               |

**Table 3S** Summary of crystallographic statistics.

| Statistic                           | mTFP1               |
|-------------------------------------|---------------------|
| Total reflections                   | 842,305             |
| Unique reflections                  | 65,393              |
| Cell dimensions (a, b, c), Å        | 89.83, 38.02, 61.12 |
| Resolution, Å                       | 35 - 1.19           |
| Highest resolution shell, Å         | 1.22 - 1.19         |
| Completeness, * %                   | 98.0 (97.4)         |
| Average $I/\sigma$ *                | 26.2 (3.0)          |
| $R_{\text{merge}}^{*\dagger}$       | 0.034 (0.364)       |
| $R_{\text{work}}^{\ddagger}$        | 0.137               |
| $R_{\text{free}}$                   | 0.207               |
| $R$ factor (all data)               | 0.149               |
| Average $B$ factors, Å <sup>2</sup> | 23.2                |
| Protein atoms                       | 20.6                |
| Solvent                             | 37.3                |
| Rmsd bond lengths, Å                | 0.014               |
| Rmsd bond angles, °                 | 0.031               |

\*Values in parentheses indicate statistics for the highest-resolution shell.

$\dagger R_{\text{merge}} = \sum_i \sum_j (I_{ij} - \langle I_i \rangle) / \sum_i \sum_j \langle I_i \rangle$ , where  $I_{ij}$  is the amplitude of the  $j$ th observation of reflection  $i$  and  $\langle I_i \rangle$  is the mean value of observations  $I_{ij}$ .

$\ddagger R$  factor =  $\sum ||F_o| - |F_c|| / \sum |F_o|$ , where  $F_o$  and  $F_c$  are the observed and calculated structure amplitudes.

**Table 4S** Experimentally determined relative fluorescence intensities for identical concentrations of mTFP1, mCerulean, and mCitrine imaged on an epi-fluorescence microscope with xenon arc lamp illumination.

| Protein   | Excitation filter <sup>a</sup> | Beamsplitter <sup>a</sup> | Intensity relative to mCerulean imaged with a HQ436/20 excitation filter and D480/40 emission filter <sup>a</sup> |          |
|-----------|--------------------------------|---------------------------|-------------------------------------------------------------------------------------------------------------------|----------|
|           |                                |                           | D480/40                                                                                                           | HQ495/30 |
| mTFP1     | D436/20                        | 455DCLP                   | 1.3                                                                                                               | 1.5      |
|           | HQ445/30                       | 470DCXR                   | ND <sup>b</sup>                                                                                                   | 2.6      |
| mCerulean | D436/20                        | 455DCLP                   | 1.0                                                                                                               | 0.8      |
|           | HQ445/30                       | 470DCXR                   | ND <sup>b</sup>                                                                                                   | 1.3      |

  

| Protein   | Excitation filter <sup>a</sup> | Beamsplitter <sup>a</sup> | TFP or CFP emission filter <sup>a</sup> | Relative intensity passed by YFP emission filter <sup>a,c</sup> |          |
|-----------|--------------------------------|---------------------------|-----------------------------------------|-----------------------------------------------------------------|----------|
|           |                                |                           |                                         | HQ535/30                                                        | HQ545/30 |
| mTFP1     | D436/20                        | 455DCLP                   | HQ495/30                                | 0.39                                                            | 0.30     |
|           | HQ445/30                       | 470DCXR                   | HQ495/30                                | 0.39                                                            | 0.30     |
| mCerulean | D436/20                        | 455DCLP                   | D480/40                                 | 0.35                                                            | 0.30     |
|           | HQ445/30                       | 470DCXR                   | HQ495/30                                | 0.41                                                            | 0.34     |
| mCitrine  | HQ500/20                       | Q515LP                    | ND <sup>b</sup>                         | 1                                                               | 0.91     |
|           | D436/20                        | 455DCLP                   | ND <sup>b</sup>                         | 0.12                                                            | 0.07     |
|           | HQ445/30                       | 470DCXR                   | ND <sup>b</sup>                         | 0.15                                                            | 0.09     |

<sup>a</sup>All filters and beamsplitters were purchased from Chroma Technology Corp. Filters are designated with Chroma part numbers. <sup>b</sup>Not determined. <sup>c</sup>For mTFP1 and mCerulean, intensities are relative to the intensity in the indicated TFP or CFP emission channel. For mCitrine, all intensities are relative to the intensity obtained with a HQ500/20 excitation filter and HQ535/30 emission filter.



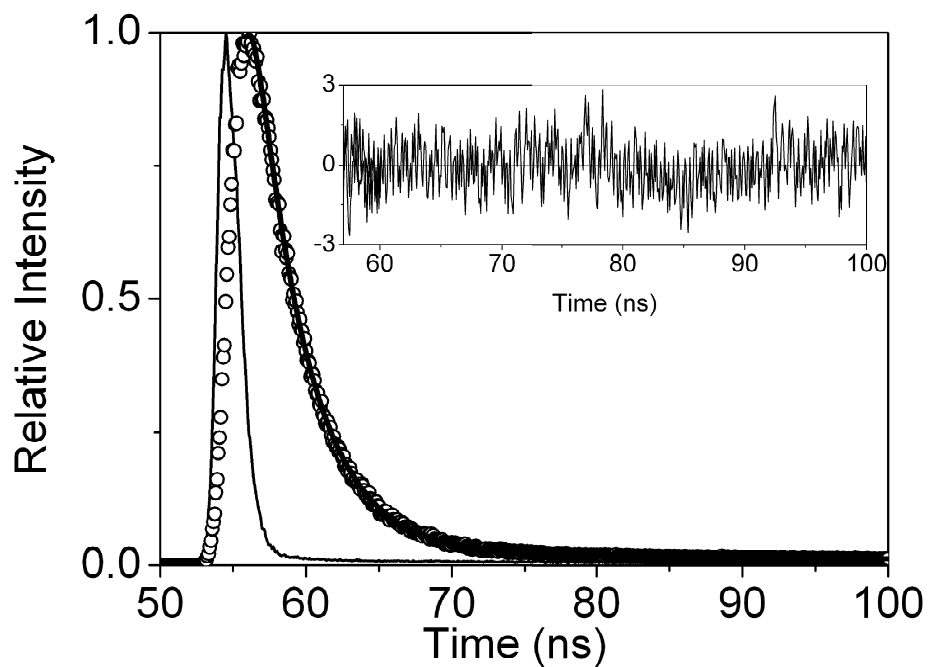

**Figure 2S Fluorescence lifetime decay of mTFP1.**

Shown is the experimental data for the lifetime decay (O) of 5 nM mTFP1 in buffer fit with a single exponential decay (thick black line) convolved with the instrument response function (thin black line). The inset is the residuals of the best single exponential fit for mTFP1 ( $\tau = 3.2$  ns,  $\chi^2 = 1.0$ ).

**REFERENCES**

- 1 Bevis, B. J. and Glick, B. S. (2002) Rapidly maturing variants of the *Discosoma* red fluorescent protein (DsRed). *Nat. Biotechnol.* **20**, 83-87
- 2 Heim, R., Cubitt, A. B. and Tsien, R. Y. (1995) Improved green fluorescence. *Nature* **373**, 663-664
- 3 Shaner, N. C., Campbell, R. E., Steinbach, P. A., Giepmans, B. N., Palmer, A. E. and Tsien, R. Y. (2004) Improved monomeric red, orange and yellow fluorescent proteins derived from *Discosoma* sp. red fluorescent protein. *Nat. Biotechnol.* **22**, 1567-1572
- 4 Campbell, R. E., Tour, O., Palmer, A. E., Steinbach, P. A., Baird, G. S., Zacharias, D. A. and Tsien, R. Y. (2002) A monomeric red fluorescent protein. *Proc. Natl. Acad. Sci. U.S.A.* **99**, 7877-7882
- 5 Matz, M. V., Fradkov, A. F., Labas, Y. A., Savitsky, A. P., Zaraisky, A. G., Markelov, M. L. and Lukyanov, S. A. (1999) Fluorescent proteins from nonbioluminescent Anthozoa species. *Nat. Biotechnol.* **17**, 969-973
